# Supplementary material
Source: PubMed Central journal article supplement (PMC5206998)
Supplement: supp_WNL.0000000000003388_e-references.pdf [file supp_WNL.0000000000003388_e-references.pdf]

## E-REFERENCES

- e1. Wang J, O'Reilly B, Venkataraman R, Mysliwiec V, Mysliwiec A. Efficacy of oral iron in patients with restless legs syndrome and a low-normal ferritin: A randomized, double-blind, placebo-controlled study. *Sleep Med* 2009;10:973–975.
- e2. Allen RP, Adler CH, Du W, Butcher A, Bregman DB, Earley CJ. Clinical efficacy and safety of IV ferric carboxymaltose (FCM) treatment of RLS: a multi-centred, placebo-controlled preliminary clinical trial. *Sleep Med* 2011;12:906–913.
- e3. Grote L, Leissner L, Hedner J, Ulfberg J. A randomized, double-blind, placebo controlled, multi-center study of intravenous iron sucrose and placebo in the treatment of restless legs syndrome. *Mov Disord* 2009;24:1445–1452.
- e4. Earley CJ, Horská A, Mohamed MA, Barker PB, Beard JL, Allen RP. A randomized, double-blind, placebo-controlled trial of intravenous iron sucrose in restless legs syndrome. *Sleep Med* 2009;10:206–211.
- e5. Trenkwalder C, Beneš H, Grote L, et al.; for the RELOXYN Study Group. Prolonged release oxycodone-naloxone for treatment of severe restless legs syndrome after failure of previous treatment: a double-blind, randomised, placebo-controlled trial with an open-label extension. *Lancet Neurol* 2013;12:1141–1150.
- e6. Mitchell UH, Myrer JW, Johnson AW, Hilton SC. Restless legs syndrome and near-infrared light: An alternative treatment option. *Physiother Theory Pract* 2011;27:345–351.
- e7. Mitchell UH, Johnson AW, Myrer JW. Comparison of two infrared devices in their effectiveness in reducing symptoms associated with RLS. *Physiother Theory Pract* 2011;27:352–359.
- e8. Lettieri CJ, Eliasson AH. Pneumatic compression devices are an effective therapy for restless legs syndrome: a prospective, randomized, double-blinded, sham-controlled trial. *Chest* 2009;135:74–80.
- e9. Koo YS, Kim SM, Lee C, et al. Transcranial direct current stimulation on primary sensorimotor area has no effect in patients with drug-naïve restless legs syndrome: a proof-of-concept clinical trial. *Sleep Med* 2015;16:280–287.
- e10. Altunrende B, Yildiz S, Cevik A, Yildiz N. Repetitive transcranial magnetic stimulation in restless legs syndrome: preliminary results. *Neurol Sci* 2014;35:1083–1088.
- e11. Burbank F, Buchfuhrer MJ, Kopjar B. Sleep improvement for restless legs syndrome patients. Part I: pooled analysis of two prospective, double-blind, sham-controlled, multi-center, randomized clinical studies of the effects of vibrating pads on RLS symptoms. *J Parkinsonism Restless Legs Syndr* 2013;3:1–10.
- e12. Burbank F, Buchfuhrer M, Kopjar B. Improving sleep for patients with restless legs syndrome. Part II: meta-analysis of vibration therapy and drugs approved by the FDA for treatment of restless legs syndrome. *J Parkinsonism Restless Legs Syndr* 2013;3:11–22.
- e13. Walker SL, Fine A, Kryger MH. L-DOPA/carbidopa for nocturnal movement disorders in uremia. *Sleep* 1996;19:214–218.
- e14. Thorp ML, Morris CD, Bagby SP. A crossover study of gabapentin in treatment of restless legs syndrome among hemodialysis patients. *Am J Kidney Dis* 2001;38:104–108.
- e15. Sloan JA, Shelly MA, Feigin A, Bernstein P, Monk RD. A double-blind, placebo-controlled trial of intravenous iron dextran therapy in patients with ESRD and restless legs syndrome. *Am J Kidney Dis* 2004;43:663–670.

- e16. Sakkas GK, Hadjigeorgiou GM, Karatzaferi C, et al. Intradialytic aerobic exercise training ameliorates symptoms of restless legs syndrome and improves functional capacity in patients on hemodialysis: a pilot study. *ASAIO J* 2008;54:185–190.
- e17. Mortazavi M, Vahdatpour B, Ghasempour A, et al. Aerobic exercise improves signs of restless leg syndrome in end stage renal disease patients suffering chronic hemodialysis. *ScientificWorldJournal* 2013. Epub 2013 Nov 6.
- e18. Tzonova D, Larrosa O, Calvo E, et al. Breakthrough symptoms during the daytime in patients with restless legs syndrome (Willis-Ekbom disease). *Sleep Med* 2012;13:151–155.
- e19. Godau J, Spinnler N, Wevers AK, Trenkwalder C, Berg D. Poor effect of guideline based treatment of restless legs syndrome in clinical practice. *J Neurol Neurosurg Psychiatry* 2010;81:1390–1395.
- e20. Mackie SE, Winkelman JW. Long-term treatment of RLS: An approach to management of worsening symptoms, loss of efficacy, and augmentation. *CNS Drugs* 2015;29:351–357.
